# Supplementary material
Source: Springer Nature journal article supplement (https://www.springermedizin.de/resource/supplementary/13054_2010_8594_MOESM4_ESM.pdf/9732322)

**Volume of gas at baseline (ml)**

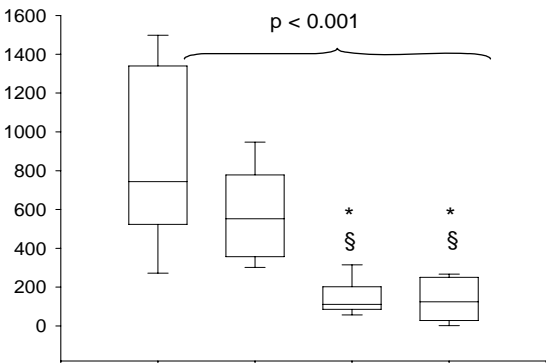

**Volume of tissue at baseline (ml)**

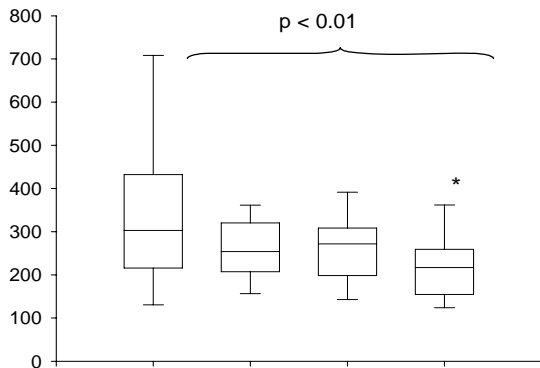

**Changes in volume of gas between H39 and baseline (ml)**

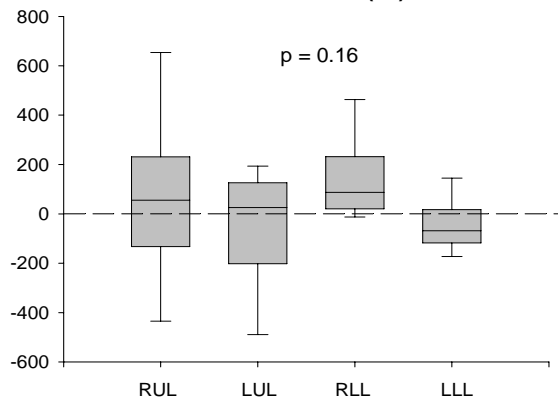

**Changes in volume of tissue between H39 and baseline (ml)**

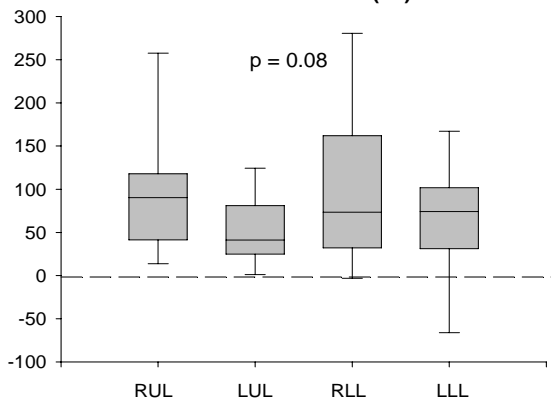

Supplement: MOESM4 [file 9732322]
